# Supplementary material for: Bacterial Communities in Various Parts of Air-Conditioning Units in 17 Japanese Houses
Source: MDPI journal article supplement (doi:10.3390/microorganisms10112246), 2022-11-13
Supplement: s1 [file s1]

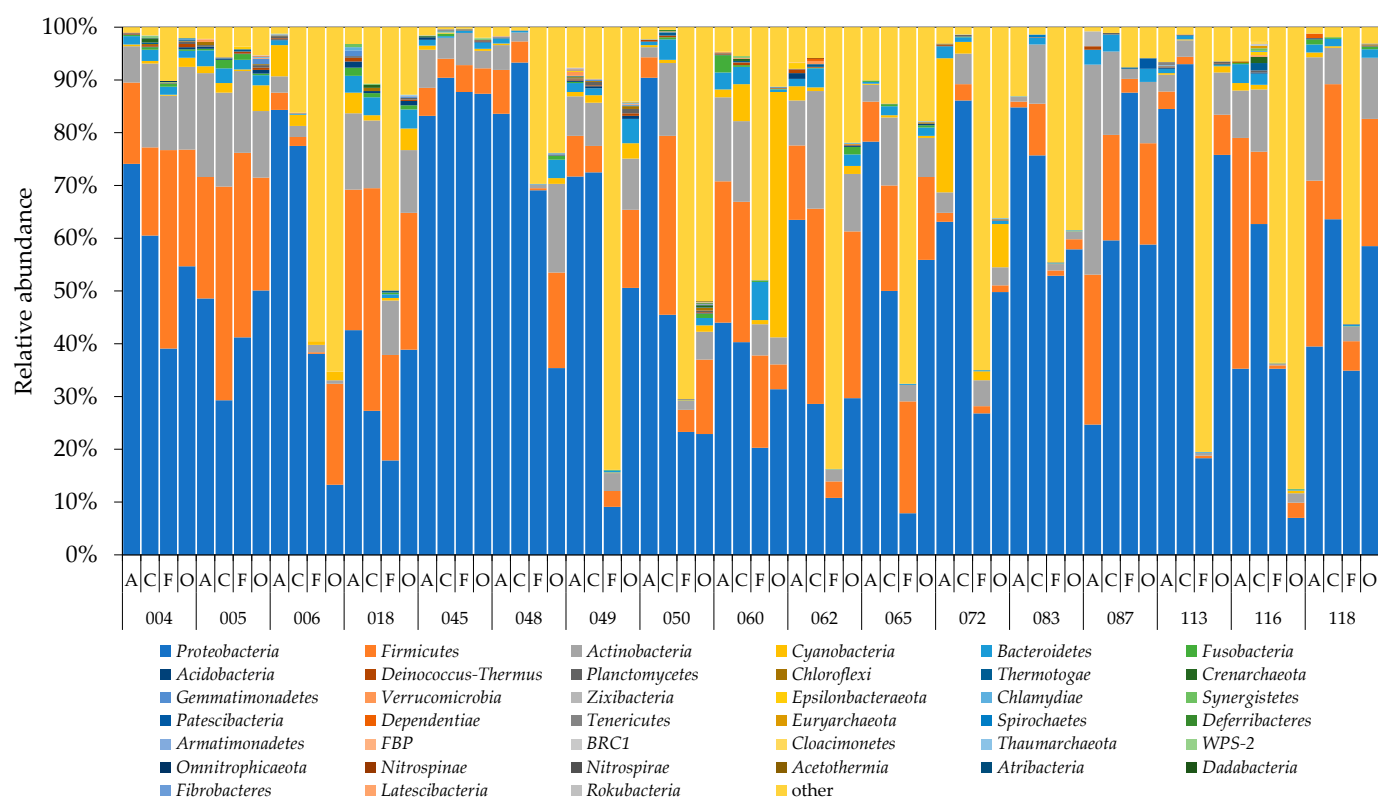

**Figure S1.** Relative abundance of bacterial phyla for all samples from the 17 houses. A, C, F, and O corresponded to air filter, cooling coil, fan, and air outlet.

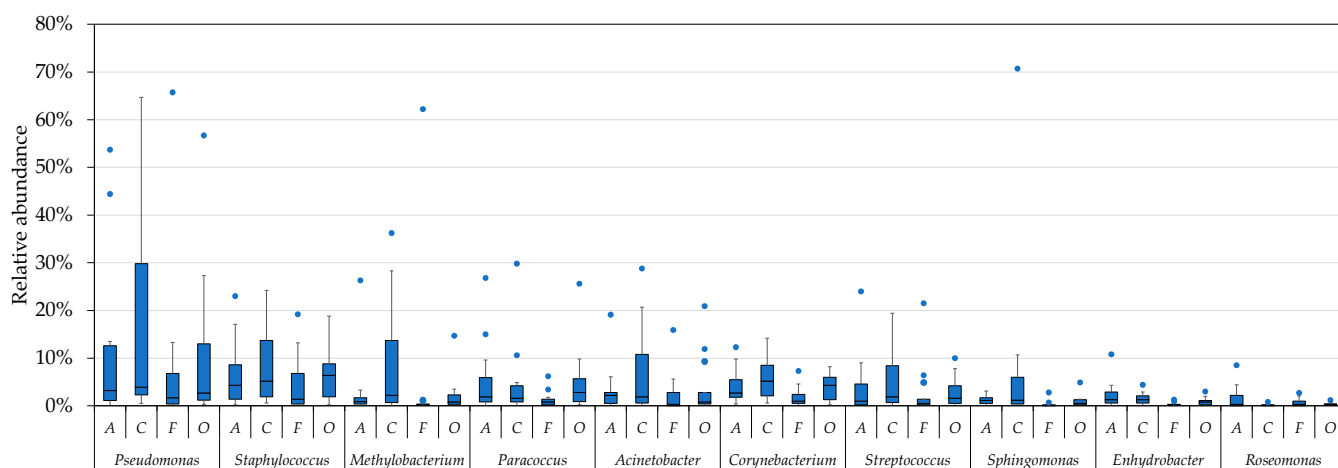

**Figure S2.** Relative abundances (quartile value) of the main genus. A, C, F, and O corresponded to air filter, cooling coil, fan, and air outlet.

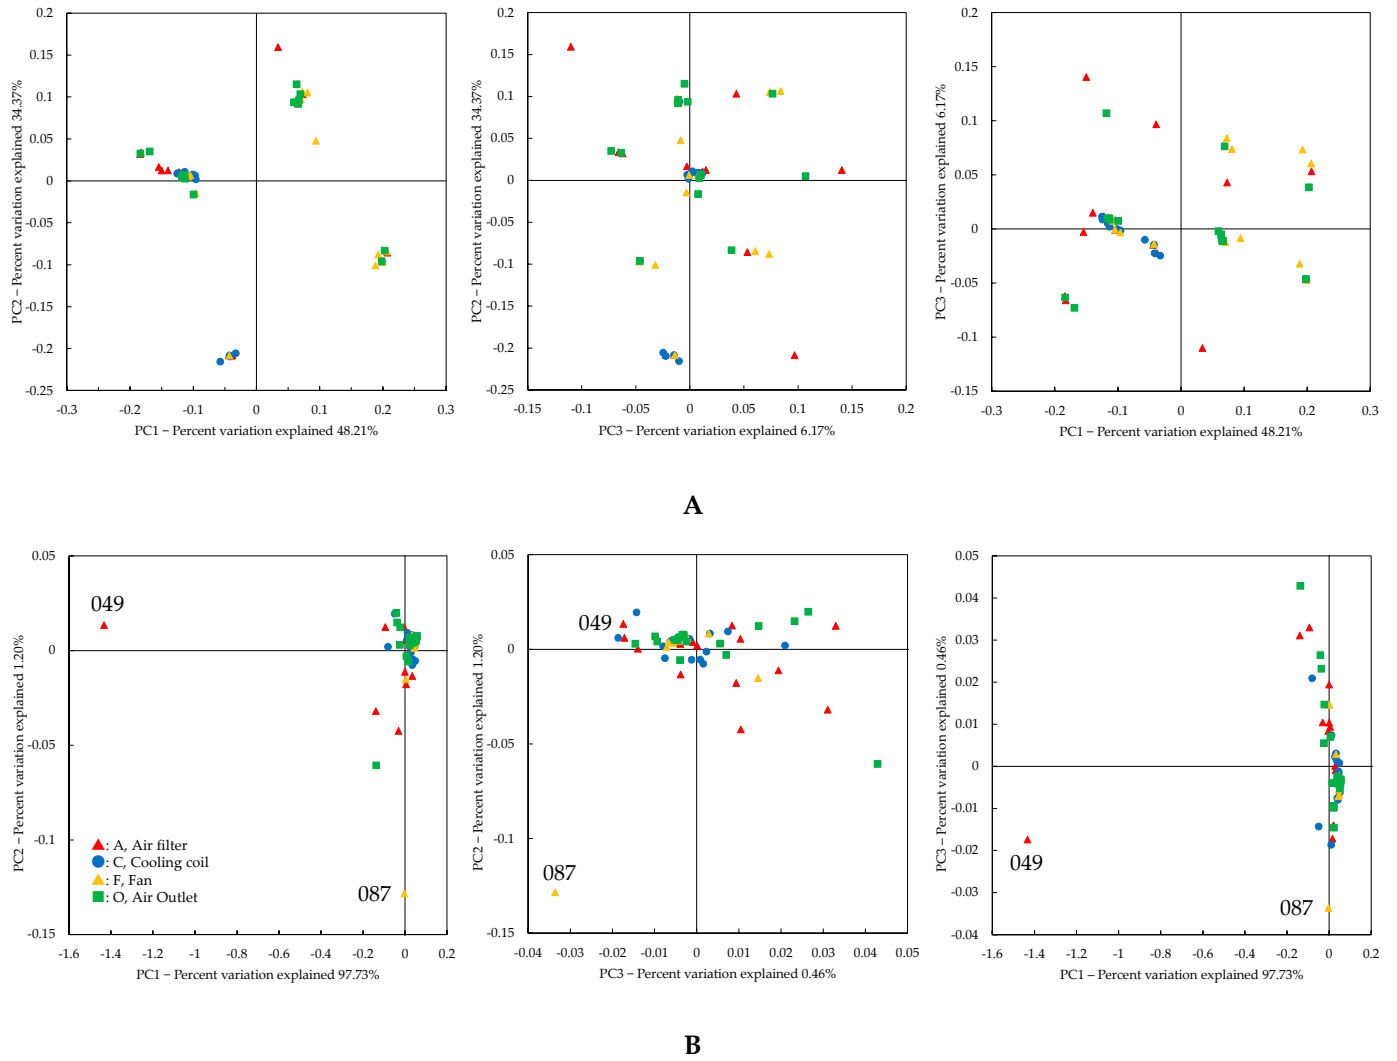

**Figure S3.** Principal coordinate analysis (PCoA) of the unweighted UniFrac distance (A) and weighted UniFrac distance (B).  
A, C, F, and O corresponded to air filter, cooling coil, fan, and air outlet.
